# Supplementary material
Source: PubMed Central journal article supplement (PMC5828880)

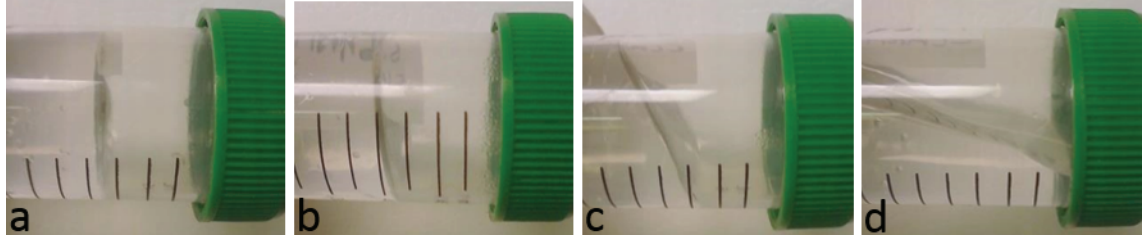

Supplemental Fig. ESM\_1.

;

Supplement: NIHMS927780-supplement-429_2017_1583_MOESM1_ESM.pdf [file NIHMS927780-supplement-429_2017_1583_MOESM1_ESM.pdf]

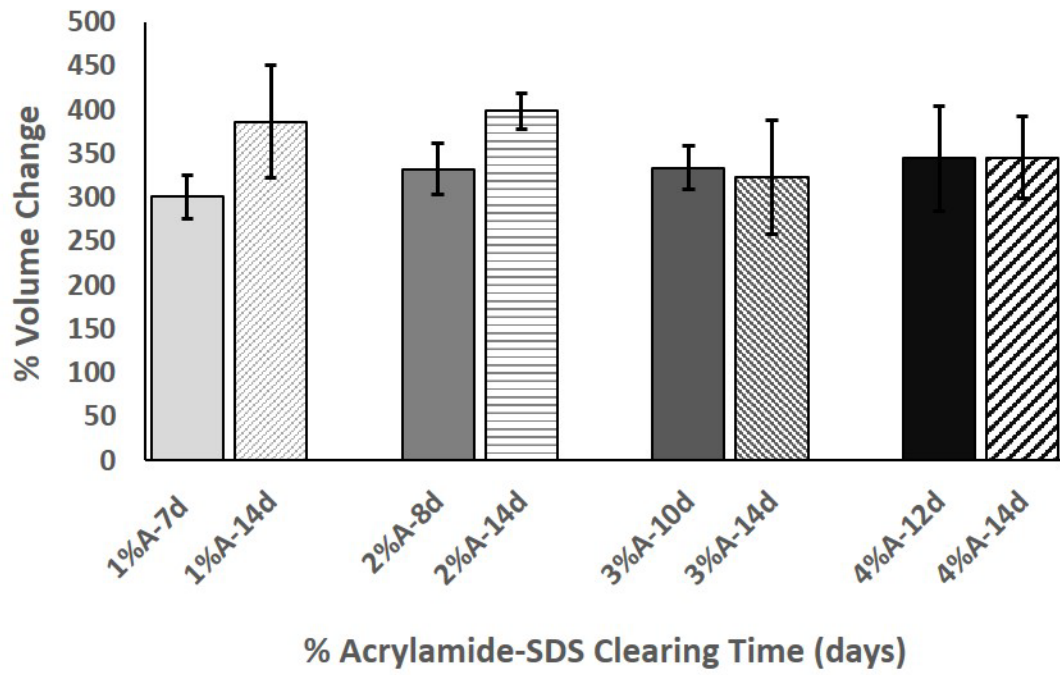

Supplementary Fig. ESM\_2.

Supplement: NIHMS927780-supplement-429_2017_1583_MOESM2_ESM.pdf [file NIHMS927780-supplement-429_2017_1583_MOESM2_ESM.pdf]

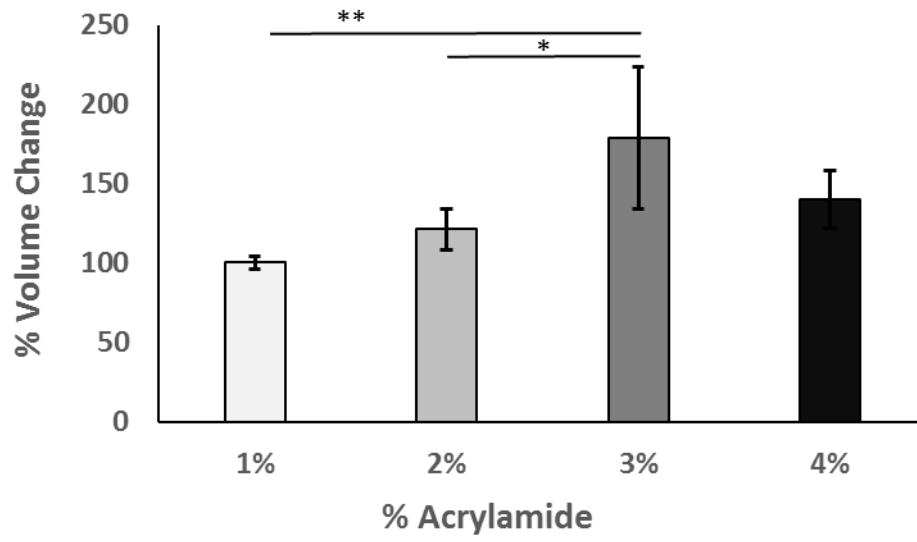

Supplemental Figure ESM\_3.

Supplement: NIHMS927780-supplement-429_2017_1583_MOESM3_ESM.pdf [file NIHMS927780-supplement-429_2017_1583_MOESM3_ESM.pdf]
